# Supplementary material
Source: publisher figshare collection journal article supplement (https://aacr.figshare.com/articles/dataset/_/22472777)
Supplement: Supplementary file 1 [file 39924281]

**Supplementary Table S3.** Grade  $\geq 3$  adverse events (regardless of relationship to study drug) in  $\geq 2$  patients in total phase 1 population

| <b>AE</b>                                                          | <b>15 mg:<br/>PiB<br/>(n=3)</b> | <b>30 mg:<br/>PiB<br/>(n=3)</b> | <b>60 mg:<br/>PiB<br/>(n=4)</b> | <b>120<br/>mg:<br/>PiB<br/>(n=3)</b> | <b>180<br/>mg:<br/>PiB<br/>(n=3)</b> | <b>180 mg:<br/>Cap<br/>(n=14)</b> | <b>180 mg:<br/>PiB +<br/>Cap<br/>(total:<br/>n=17)</b> | <b>270<br/>mg:<br/>Cap<br/>(n=6)</b> | <b>210<br/>mg:<br/>Cap<br/>(n=9)</b> | <b>Phase 1<br/>total<br/>(N=45)</b> |
|--------------------------------------------------------------------|---------------------------------|---------------------------------|---------------------------------|--------------------------------------|--------------------------------------|-----------------------------------|--------------------------------------------------------|--------------------------------------|--------------------------------------|-------------------------------------|
| Total treatment-emergent grade $\geq 3$ AEs, n                     | 1                               | 5                               | 3                               | 5                                    | 0                                    | 20                                | 20                                                     | 11                                   | 25                                   | 70                                  |
| Patients with $\geq 1$ treatment-emergent grade $\geq 3$ AE, n (%) | 1 (33)                          | 3 (100)                         | 2 (50)                          | 1 (33)                               | 0                                    | 7 (50)                            | 7 (41)                                                 | 6 (100)                              | 7 (78)                               | 27 (60)                             |
| Anemia                                                             | 0                               | 0                               | 0                               | 0                                    | 0                                    | 3 (21)                            | 3 (18)                                                 | 1 (17)                               | 2 (22)                               | 6 (13)                              |
| Increased lipase                                                   | 0                               | 0                               | 1 (25)                          | 0                                    | 0                                    | 0                                 | 0                                                      | 2 (33)                               | 2 (22)                               | 5 (11)                              |
| Lymphopenia                                                        | 1 (33)                          | 1 (33)                          | 0                               | 1 (33)                               | 0                                    | 0                                 | 0                                                      | 1 (17)                               | 0                                    | 4 (9)                               |
| Hypophosphatemia                                                   | 0                               | 2 (67)                          | 0                               | 0                                    | 0                                    | 0                                 | 0                                                      | 0                                    | 1 (11)                               | 3 (7)                               |
| Abdominal pain                                                     | 0                               | 0                               | 0                               | 0                                    | 0                                    | 0                                 | 0                                                      | 0                                    | 2 (22)                               | 2 (4)                               |
| Acute respiratory failure                                          | 0                               | 0                               | 0                               | 0                                    | 0                                    | 1 (7)                             | 1 (6)                                                  | 0                                    | 1 (11)                               | 2 (4)                               |
| Dyspnea                                                            | 0                               | 0                               | 0                               | 0                                    | 0                                    | 1 (7)                             | 1 (6)                                                  | 0                                    | 1 (11)                               | 2 (4)                               |
| Hyponatremia                                                       | 0                               | 1 (33)                          | 0                               | 0                                    | 0                                    | 0                                 | 0                                                      | 0                                    | 1 (11)                               | 2 (4)                               |
| Large intestinal obstruction                                       | 0                               | 0                               | 0                               | 0                                    | 0                                    | 1 (7)                             | 1 (6)                                                  | 0                                    | 1 (11)                               | 2 (4)                               |
| Pneumonia                                                          | 0                               | 0                               | 0                               | 0                                    | 0                                    | 1 (7)                             | 1 (6)                                                  | 0                                    | 1 (11)                               | 2 (4)                               |
| Sepsis                                                             | 0                               | 0                               | 0                               | 0                                    | 0                                    | 2 (14)                            | 2 (12)                                                 | 0                                    | 0                                    | 2 (4)                               |

Cap, capsule.
